# Supplementary material for: A pilot study of biomechanical assessment before and after an integrative training program for adolescents with juvenile fibromyalgia
Source: Pediatr Rheumatol Online J. 2016 Jul 22;14:43. doi: 10.1186/s12969-016-0103-7 (PMC4957340; doi:10.1186/s12969-016-0103-7)
Supplement: Additional file 1: — Balance and Strength database. (XLSX 16 kb) [file 12969_2016_103_MOESM1_ESM.xlsx]

## Sheet: Sheet1
Subject ID	Testing Type	Pre_Joint Laxity Score	Pre_R Leg Length	Pre_L Leg Length	Pre_Y Balance Rant	Pre_Y Balance Rpm	Pre_Y Balance Rpl	Pre_R Composite Score	Pre_Y Balance Lant	Pre_Y Balance Lpm	Pre_Y Balance Lpl	Pre_L Composite Score	Pre_RKnee300Extension-Nm/kg	Pre_LKneeExtension300-Nm/kg	Pre_Rknee FLEX Nm/kg	Pre_Lknee Flex Nm/kg	Pre_Left H/Q Ratio	Pre_RhipNm/kg	Pre_LhipNm/kg	Subject ID	Testing Type	post_Joint Laxity Score	post_R Leg Length	post_L Leg Length	post_Y Balance Rant	post_Y Balance Rpm	post_Y Balance Rpl	post_R Composite Score	post_Y Balance Lant	post_Y Balance Lpm	post_Y Balance Lpl	post_L Composite Score	post_RKnee300Extension-Nm/kg	post_LKneeExtension300-Nm/kg	post_Rknee FLEX Nm/kg	post_Lknee Flex Nm/Kg	post_Left H/Q Ratio	post_RHipNm/kg	post_LHipNm/kg
fit002	Pre	n/a	83.7	82.74	41	57	71	67.3039	44	72	54	68.4876	0.980043	1.01308	0.744667	0.722644	0.713315	0.550586	0.481763	fit002	Post	4	83.7	82.74	58	83	67	82.8355	48	89	76	85.811	1.02267	1.04588	0.503824	0.503824	0.481723	0.641726	0.819225
fit003	Pre	2	84.1	84.3	54	72	64	75.3072	56	83	66	81.0597	0.994556	0.887175	0.623835	0.634062	0.714697	0.613608	0.664742	fit003	Post	0	84.1	84.3	56	77	79	84.027	58	95	78	91.3405	0.869608	0.891027	0.421953	0.518338	0.581731	0.771081	0.685406
fit007	Pre	7	85	84	41	75	92	81.5686	49	105	60	84.9206	0.916041	0.90836	0.622217	0.699034	0.769556	0.72976	0.844986	fit007	Post	7	85	84	41	75	92	81.5686	49	105	60	84.9206	0.916041	0.90836	0.622217	0.699034	0.769556	0.72976	0.844986
fit009	Pre	4	83	83	45	69	75	75.9036	44	79	66	75.9036	1.17106	1.17391	0.824292	0.642379	0.547215	0.710596	0.568477	fit009	Post	4	83	83	45	69	75	75.9036	44	79	66	75.9036	1.17106	1.17391	0.824292	0.642379	0.547215	0.710596	0.568477
fit010	Pre2	5	84.5	85.5	53	71	82	81.2623	50	77	73	77.9727	1.27974	1.42646	0.836858	0.790667	0.554286	1.05966	1.03249	fit010	Post	2	83	83.5	62	83	93	95.5823	59	95	82	94.2116	1.35314	1.18165	0.801165	0.811883	0.687075	1.17897	1.63448
fit011	Pre	7	85.5	83.5	55	86	88	89.2788	53	87	88	91.018	1.03115	1.11804	0.85053	0.845957	0.756646	1.2575	0.983139	fit011	post1	5	85	84	52	59	113	87.8431	57	110	62	90.873	1.16148	0.708775	1.12718	0.791084	1.11613	1.02887	0.868821
fit012	Pre	1	78.5	77	51	83	79	90.4459	47	84	66	85.2814	1.00407	0.767444	0.509498	0.601165	0.783333	0.788762	0.767444	fit012	post	2	78	77.5	54	79	95	97.4359	49	94	85	98.0645	1.20444	0.971889	0.691072	0.739338	0.760722	1.16276	1.16276
fit013	Pre	2	90.5	89.5	49	74	77	73.6648	48	81	63	71.5084	0.602199	0.737955	0.541283	0.689222	0.933962	0.121832	0.174046	fit013	post	3	89.5	89	51	75	78	75.9777	47	81	74	75.6554	0.894079	0.856033	0.712496	0.719414	0.840404	0.380459	0.415046
fit015	Pre2	4	83.5	82.5	56	83	85	89.4212	62	92	76	92.9293	1.10239	1.12013	0.676642	0.836299	0.746606	0.861641	0.810957	fit015	post	4	83	83	50	71	104	90.3614	56	83	73	85.1406	1.14892	1.40693	0.820306	0.761887	0.541522	1.26575	1.53351
fit016	Pre	0	90.5	91	64	81	91	86.9245	59	93	66	79.8535	0.991507	0.929408	0.709993	0.488508	0.525612	0.641685	0.703783	fit016	post	2	90	89.5	59	79	79	80.3704	55	82	68	76.3501	1.10967	1.13994	0.807034	0.748524	0.656637	1.02897	0.726331
fit017	Pre	0	84	85.5	56	80	78	84.9206	61	84	66	82.2612	1.26231	0.976299	0.874544	0.962548	0.985915	0.660033	0.880044	fit017	post	0	84	83.5	65	87	80	92.0635	53	86	76	85.8283	1.29628	1.24216	0.841635	1.10143	0.88671	1.0013	0.73068
